# Supplementary material for: Few-layer selenium-doped black phosphorus: synthesis, nonlinear optical properties and ultrafast photonics applications
Source: Royal Society of Chemistry journal article supplement (doi:10.1039/c7tc01267e), 2017-01-01
Supplement: c7tc01267e1.pdf [file c7tc01267e1.pdf]

## Few-layer Selenium-doped black phosphorus: synthesis, nonlinear optical properties and ultrafast photonics applications

Yanqi Ge, Si Chen, Yijun Xu, Zhiliang He, Zhiming Liang, Yunxiang Chen, Yufeng Song, Dianyuan Fan, Kai Zhang, and Han Zhang

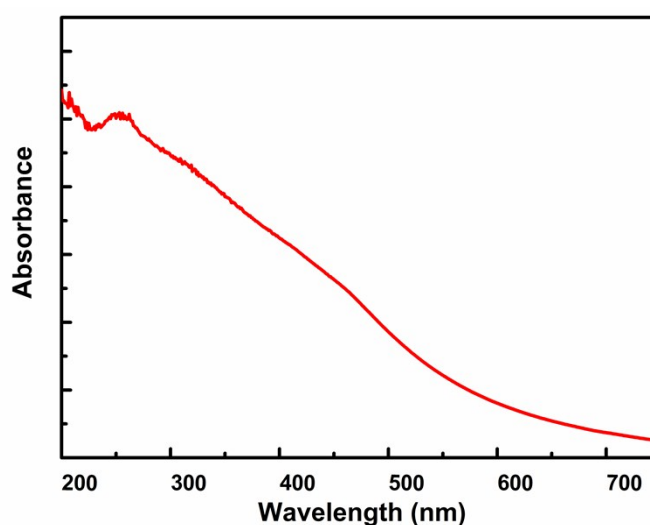

UV-Vis absorbance spectra was employed to determine the absorption properties of Se-doped BP films dispersed in water solution.
